# Supplementary material for: DNA methylation expression patterns predict outcome of clear cell renal cell carcinoma
Source: Research Square preprint supplement (doi:10.21203/rs.3.rs-6091278/v1), 2025-04-21

**Supplementary Figure**

**Figure S1**

A Least absolute shrinkage and selection operator (LASSO) analysis and LASSO coefficient of 67 significantly different CpGs associated with prognosis.

B Tenfold cross-validation of the LASSO Cox model.


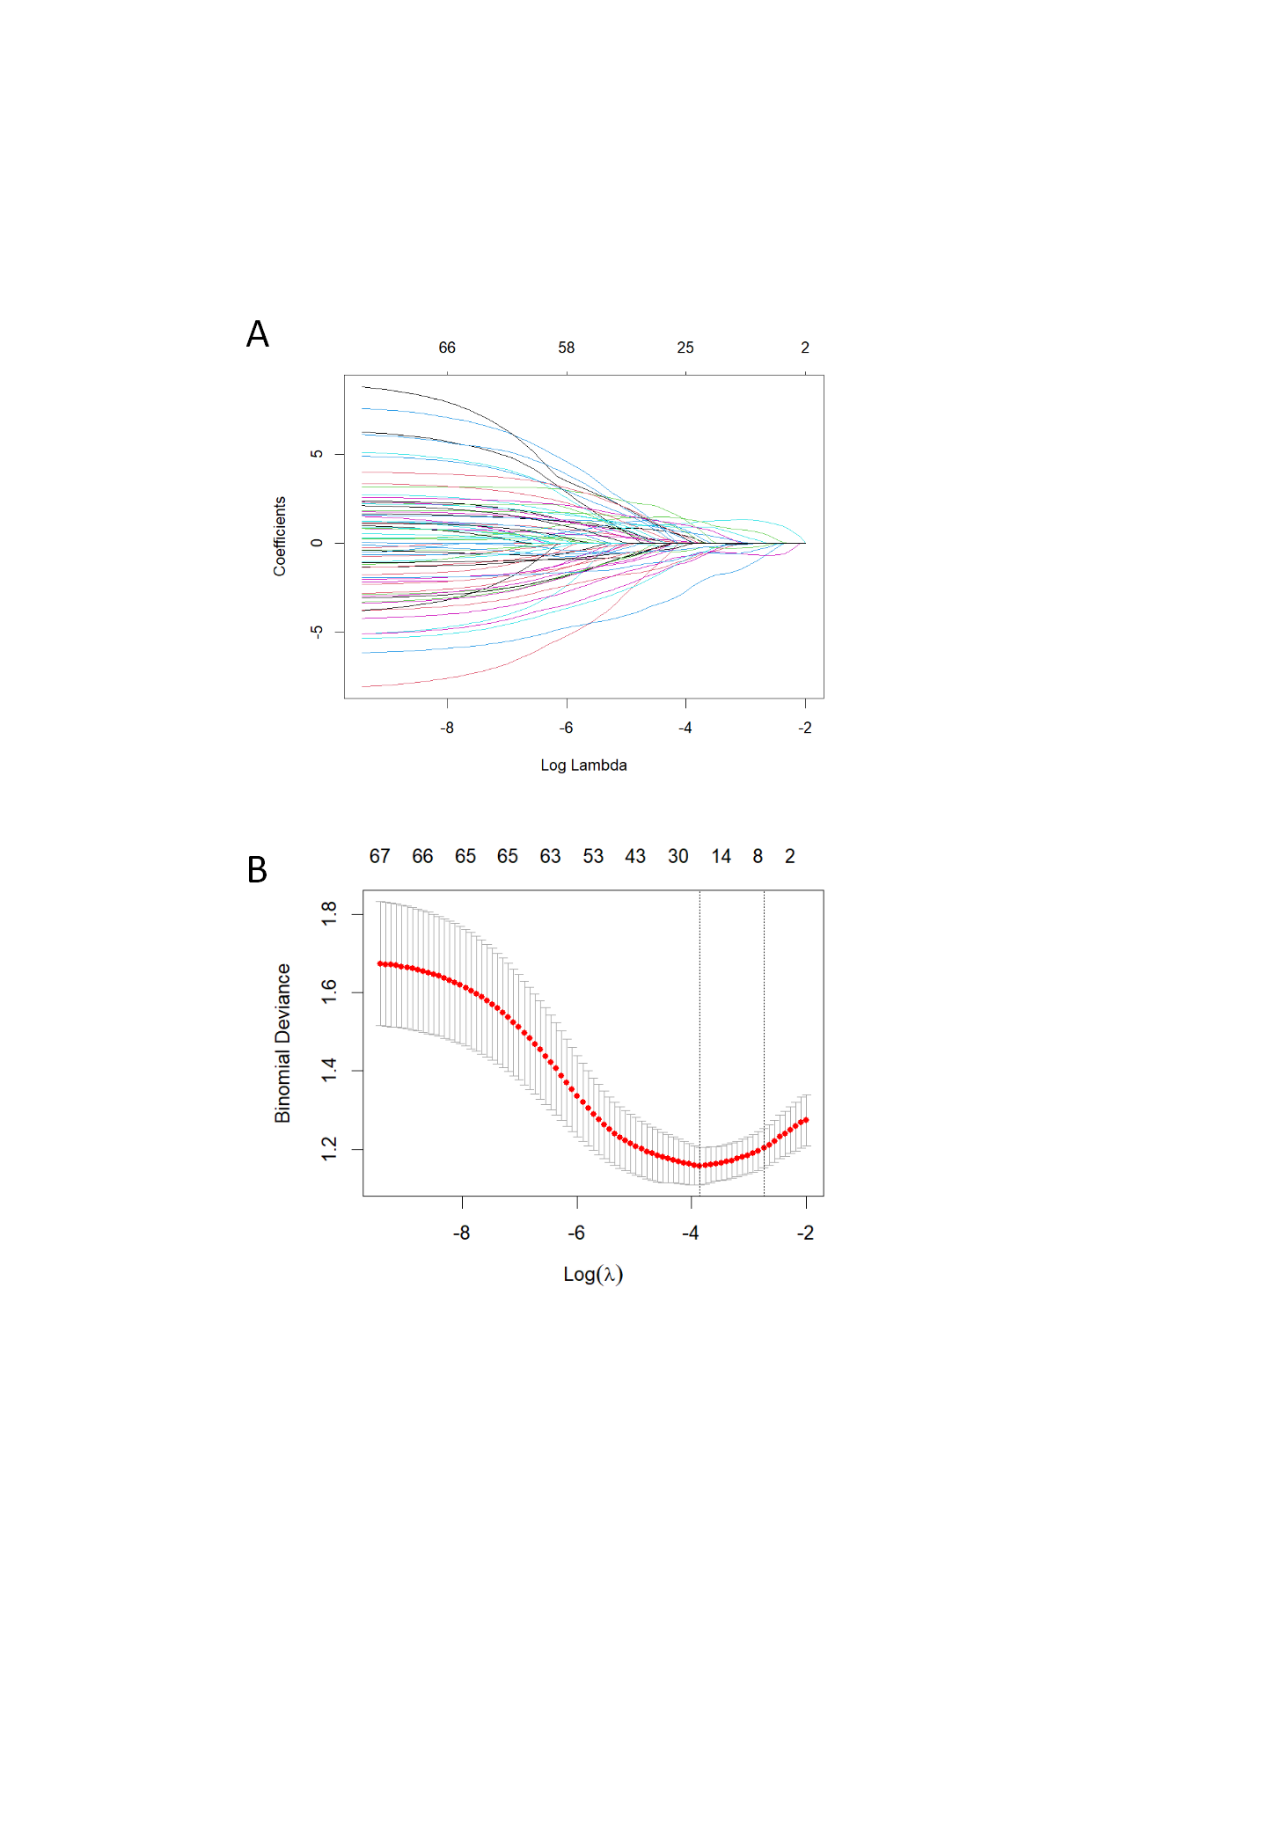


**Figure S2**

Kaplan-Meier curve showing the survival analysis results of high-risk group and low-risk group based on the risk score from the 13 key CpGs respectively.

A cg22727783 (p = 0.004)

B cg12520319 (p = 0.05)

C cg04156940 (p = 0.052)

D cg05117638 (p = 0.018)

E cg03819134 (p < 0.001)

F cg27376024 (p = 0.01)

G cg06764092 (p < 0.001)

H cg23828876 (p = 0.016)

I cg03003434 (p = 0.021)


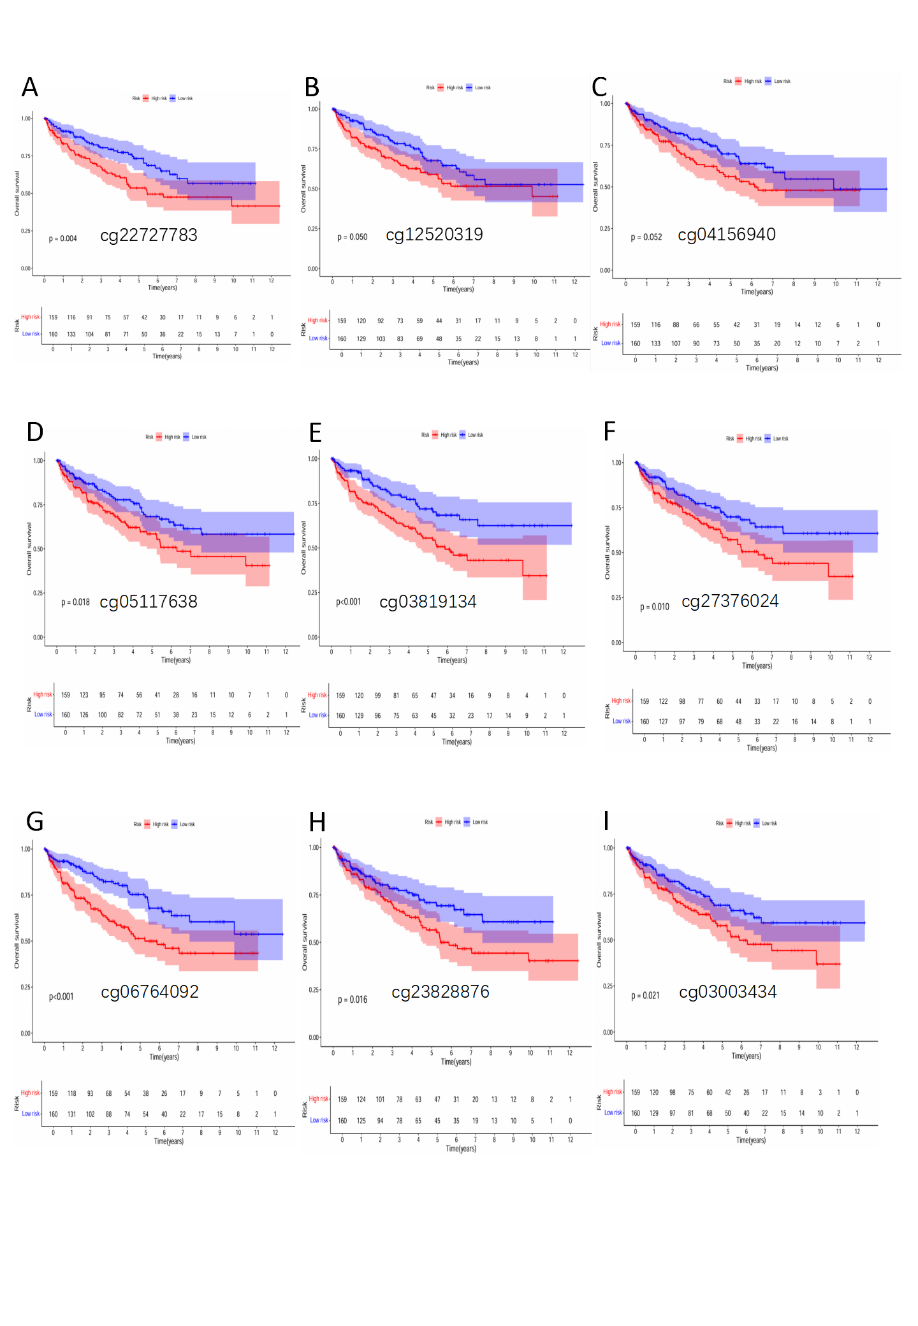


**Figure S3**

Survival analysis results of different risk groups based on the risk score from the 13 key CpGs respectively.

A cg11868461 (p = 0.005)

B cg07851269 (p = 0.039)

C cg02044895 (p < 0.001)

D cg13005202 (p < 0.001)

E cg13005202 (p < 0.001)


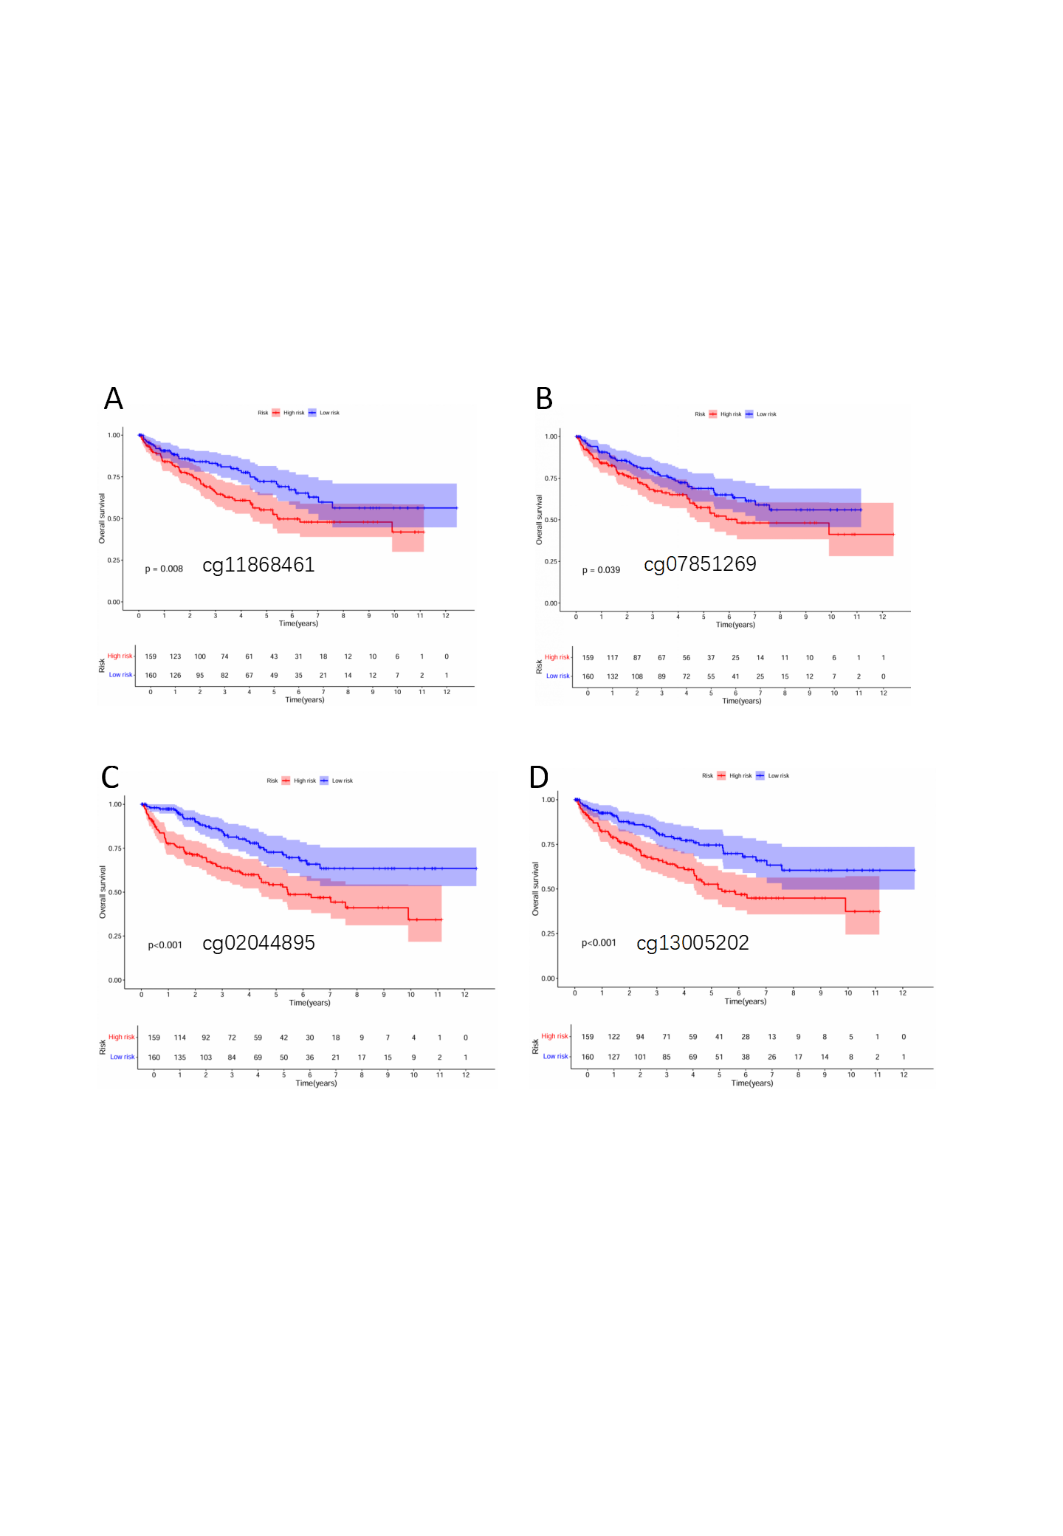

Supplement: Supplementary file 1 [file 04f8182b5a1dd2eab6c73344.docx]
