# Supplementary material for: DNA methylation expression patterns predict outcome of clear cell renal cell carcinoma
Source: Research Square preprint supplement (doi:10.21203/rs.3.rs-6091278/v1), 2025-04-21
Supplement: Supplementary file 2 [file a80c561941ff56b950e036d5.xlsx]

## Sheet: Sheet1
Supplementary table 1. The clinical baseline characteristics of selected data.
sample	gender	age	stage	T	N	M	group
TCGA-3Z-A93Z-01A	male	69	Stage I	T1	N0	M0	Tumor
TCGA-6D-AA2E-01A	female	68	Stage I	T1	NX	MX	Tumor
TCGA-A3-3357-01A	male	62	Stage II	T2	N0	M0	Tumor
TCGA-A3-3357-11A	male	62	Stage II	T2	N0	M0	Normal
TCGA-A3-3358-01A	female	57	Stage I	T1	N0	M0	Tumor
TCGA-A3-3367-01A	male	72	Stage I	T1	N0	M0	Tumor
TCGA-A3-3367-11A	male	72	Stage I	T1	N0	M0	Normal
TCGA-A3-3370-01A	female	48	Stage I	T1	N0	M0	Tumor
TCGA-A3-3370-11A	female	48	Stage I	T1	N0	M0	Normal
TCGA-A3-3373-01A	female	54	Stage I	T1	N0	M0	Tumor
TCGA-A3-3373-11A	female	54	Stage I	T1	N0	M0	Normal
TCGA-A3-3376-01A	male	51	Stage I	T1	N0	M0	Tumor
TCGA-A3-3376-11A	male	51	Stage I	T1	N0	M0	Normal
TCGA-A3-3385-01A	female	46	Stage I	T1	N0	M0	Tumor
TCGA-A3-3385-11A	female	46	Stage I	T1	N0	M0	Normal
TCGA-A3-3387-01A	male	49	Stage I	T1	N0	M0	Tumor
TCGA-A3-A6NI-01A	male	47	Stage I	T1	NX	MX	Tumor
TCGA-A3-A6NJ-01A	female	57	Stage I	T1	NX	MX	Tumor
TCGA-A3-A6NL-01A	female	49	Stage I	T1	NX	MX	Tumor
TCGA-A3-A6NN-01A	male	78	Stage I	T1	NX	MX	Tumor
TCGA-A3-A8CQ-01A	female	59	Stage I	T1	NX	MX	Tumor
TCGA-A3-A8OU-01A	female	74	Stage I	T1	NX	MX	Tumor
TCGA-A3-A8OV-01A	male	75	Stage I	T1	NX	MX	Tumor
TCGA-A3-A8OW-01A	male	37	Stage III	T3	NX	MX	Tumor
TCGA-A3-A8OX-01A	female	65	Stage I	T1	NX	MX	Tumor
TCGA-AK-3425-01A	male	68	Stage I	T1	N0	M0	Tumor
TCGA-AK-3428-01A	male	62	Stage III	T3	N0	M0	Tumor
TCGA-AK-3431-01A	female	62	Stage II	T2	NX	M0	Tumor
TCGA-AK-3433-01A	female	48	Stage II	T2	N0	M0	Tumor
TCGA-AK-3434-01A	male	72	Stage I	T1	NX	M0	Tumor
TCGA-AK-3440-01A	male	58	Stage I	T1	NX	M0	Tumor
TCGA-AK-3445-01A	male	69	Stage III	T3	NX	M0	Tumor
TCGA-AK-3450-01A	female	85	Stage I	T1	N0	M0	Tumor
TCGA-AK-3453-01A	female	58	Stage II	T2	NX	M0	Tumor
TCGA-AK-3454-01A	male	84	Stage I	T1	NX	M0	Tumor
TCGA-AK-3458-01A	male	48	Stage I	T1	NX	M0	Tumor
TCGA-AK-3460-01A	male	58	Stage I	T1	NX	M0	Tumor
TCGA-AK-3461-01A	male	72	Stage I	T1	NX	M0	Tumor
TCGA-B0-4688-01A	male	46	Stage IV	T4	N0	M1	Tumor
TCGA-B0-4688-11A	male	46	Stage IV	T4	N0	M1	Normal
TCGA-B0-4690-01A	male	65	Stage IV	T4	N0	M1	Tumor
TCGA-B0-4690-11A	male	65	Stage IV	T4	N0	M1	Normal
TCGA-B0-4691-01A	male	55	Stage IV	T2	N0	M1	Tumor
TCGA-B0-4691-11A	male	55	Stage IV	T2	N0	M1	Normal
TCGA-B0-4693-01A	female	72	Stage III	T3	N0	M0	Tumor
TCGA-B0-4693-11A	female	72	Stage III	T3	N0	M0	Normal
TCGA-B0-4694-01A	male	72	Stage III	T3	NX	M0	Tumor
TCGA-B0-4694-11A	male	72	Stage III	T3	NX	M0	Normal
TCGA-B0-4696-01A	male	58	Stage III	T3	N0	M0	Tumor
TCGA-B0-4696-11A	male	58	Stage III	T3	N0	M0	Normal
TCGA-B0-4697-01A	female	46	Stage IV	T3	NX	M1	Tumor
TCGA-B0-4697-11A	female	46	Stage IV	T3	NX	M1	Normal
TCGA-B0-4698-01A	male	75	Stage IV	T4	NX	M0	Tumor
TCGA-B0-4698-11A	male	75	Stage IV	T4	NX	M0	Normal
TCGA-B0-4699-01A	male	74	Stage IV	T4	N0	M1	Tumor
TCGA-B0-4699-11A	male	74	Stage IV	T4	N0	M1	Normal
TCGA-B0-4700-01A	male	60	Stage IV	T4	NX	M1	Tumor
TCGA-B0-4701-01A	female	66	Stage IV	T3	N0	M1	Tumor
TCGA-B0-4701-11A	female	66	Stage IV	T3	N0	M1	Normal
TCGA-B0-4703-01A	male	51	Stage IV	T3	N0	M1	Tumor
TCGA-B0-4703-11A	male	51	Stage IV	T3	N0	M1	Normal
TCGA-B0-4706-01A	male	61	Stage III	T3	NX	M0	Tumor
TCGA-B0-4706-11A	male	61	Stage III	T3	NX	M0	Normal
TCGA-B0-4707-01A	male	63	Stage III	T3	NX	M0	Tumor
TCGA-B0-4707-11A	male	63	Stage III	T3	NX	M0	Normal
TCGA-B0-4710-01A	female	75	Stage III	T3	N0	M0	Tumor
TCGA-B0-4710-11A	female	75	Stage III	T3	N0	M0	Normal
TCGA-B0-4712-01A	male	76	Stage IV	T3	NX	M1	Tumor
TCGA-B0-4712-11A	male	76	Stage IV	T3	NX	M1	Normal
TCGA-B0-4713-01A	female	76	Stage III	T3	NX	M0	Tumor
TCGA-B0-4713-11A	female	76	Stage III	T3	NX	M0	Normal
TCGA-B0-4714-01A	male	81	Stage IV	T3	NX	M1	Tumor
TCGA-B0-4714-11A	male	81	Stage IV	T3	NX	M1	Normal
TCGA-B0-4718-01A	male	57	Stage III	T3	NX	M0	Tumor
TCGA-B0-4718-11A	male	57	Stage III	T3	NX	M0	Normal
TCGA-B0-4810-01A	male	47	Stage III	T3	N1	M0	Tumor
TCGA-B0-4810-11A	male	47	Stage III	T3	N1	M0	Normal
TCGA-B0-4811-01A	male	48	Stage III	T3	N0	M0	Tumor
TCGA-B0-4811-11A	male	48	Stage III	T3	N0	M0	Normal
TCGA-B0-4813-01A	male	68	Stage III	T3	NX	M0	Tumor
TCGA-B0-4813-11A	male	68	Stage III	T3	NX	M0	Normal
TCGA-B0-4814-01A	male	58	Stage IV	T4	N0	M1	Tumor
TCGA-B0-4814-11A	male	58	Stage IV	T4	N0	M1	Normal
TCGA-B0-4815-01A	male	65	Stage III	T3	NX	M0	Tumor
TCGA-B0-4815-11A	male	65	Stage III	T3	NX	M0	Normal
TCGA-B0-4816-01A	male	49	Stage II	T2	N0	M0	Tumor
TCGA-B0-4816-11A	male	49	Stage II	T2	N0	M0	Normal
TCGA-B0-4817-01A	male	81	Stage III	T3	N0	M0	Tumor
TCGA-B0-4817-11A	male	81	Stage III	T3	N0	M0	Normal
TCGA-B0-4818-01A	female	68	Stage II	T2	NX	M0	Tumor
TCGA-B0-4818-11A	female	68	Stage II	T2	NX	M0	Normal
TCGA-B0-4819-01A	female	60	Stage IV	T3	NX	M1	Tumor
TCGA-B0-4819-11A	female	60	Stage IV	T3	NX	M1	Normal
TCGA-B0-4821-01A	female	68	Stage III	T3	N0	M0	Tumor
TCGA-B0-4821-11A	female	68	Stage III	T3	N0	M0	Normal
TCGA-B0-4822-01A	male	78	Stage II	T2	NX	M0	Tumor
TCGA-B0-4822-11A	male	78	Stage II	T2	NX	M0	Normal
TCGA-B0-4823-01A	male	88	Stage I	T1	N0	M0	Tumor
TCGA-B0-4823-11A	male	88	Stage I	T1	N0	M0	Normal
TCGA-B0-4824-01A	female	49	Stage I	T1	N0	M0	Tumor
TCGA-B0-4824-11A	female	49	Stage I	T1	N0	M0	Normal
TCGA-B0-4827-01A	female	77	Stage III	T3	N0	M0	Tumor
TCGA-B0-4827-11A	female	77	Stage III	T3	N0	M0	Normal
TCGA-B0-4828-01A	male	79	Stage IV	T2	NX	M1	Tumor
TCGA-B0-4828-11A	male	79	Stage IV	T2	NX	M1	Normal
TCGA-B0-4841-01A	male	63	Stage IV	T2	NX	M1	Tumor
TCGA-B0-4841-11A	male	63	Stage IV	T2	NX	M1	Normal
TCGA-B0-4842-01A	female	73	Stage III	T3	N0	M0	Tumor
TCGA-B0-4842-11A	female	73	Stage III	T3	N0	M0	Normal
TCGA-B0-4843-01A	male	57	Stage III	T3	N0	M0	Tumor
TCGA-B0-4843-11A	male	57	Stage III	T3	N0	M0	Normal
TCGA-B0-4844-01A	male	60	Stage IV	T3	NX	M1	Tumor
TCGA-B0-4844-11A	male	60	Stage IV	T3	NX	M1	Normal
TCGA-B0-4845-01A	male	70	Stage IV	T3	NX	M1	Tumor
TCGA-B0-4845-11A	male	70	Stage IV	T3	NX	M1	Normal
TCGA-B0-4846-01A	male	52	Stage IV	T3	N0	M1	Tumor
TCGA-B0-4846-11A	male	52	Stage IV	T3	N0	M1	Normal
TCGA-B0-4847-01A	male	60	Stage IV	T3	NX	M1	Tumor
TCGA-B0-4847-11A	male	60	Stage IV	T3	NX	M1	Normal
TCGA-B0-4848-01A	male	54	Stage III	T3	NX	M0	Tumor
TCGA-B0-4848-11A	male	54	Stage III	T3	NX	M0	Normal
TCGA-B0-4849-01A	male	51	Stage III	T3	NX	M0	Tumor
TCGA-B0-4849-11A	male	51	Stage III	T3	NX	M0	Normal
TCGA-B0-4852-01A	female	78	Stage II	T2	N0	M0	Tumor
TCGA-B0-4852-11A	female	78	Stage II	T2	N0	M0	Normal
TCGA-B0-4945-01A	female	75	Stage I	T1	N0	M0	Tumor
TCGA-B0-4945-11A	female	75	Stage I	T1	N0	M0	Normal
TCGA-B0-5080-01A	male	63	Stage IV	T3	N0	M1	Tumor
TCGA-B0-5080-11A	male	63	Stage IV	T3	N0	M1	Normal
TCGA-B0-5083-01A	male	63	Stage I	T1	N0	M0	Tumor
TCGA-B0-5083-11A	male	63	Stage I	T1	N0	M0	Normal
TCGA-B0-5092-01A	female	53	Stage IV	T1	N0	M1	Tumor
TCGA-B0-5092-11A	female	53	Stage IV	T1	N0	M1	Normal
TCGA-B0-5094-01A	male	62	Stage IV	T3	N0	M1	Tumor
TCGA-B0-5094-11A	male	62	Stage IV	T3	N0	M1	Normal
TCGA-B0-5095-01A	male	81	Stage III	T3	N0	M0	Tumor
TCGA-B0-5095-11A	male	81	Stage III	T3	N0	M0	Normal
TCGA-B0-5096-01A	female	72	Stage III	T3	N1	M0	Tumor
TCGA-B0-5096-11A	female	72	Stage III	T3	N1	M0	Normal
TCGA-B0-5097-01A	female	59	Stage III	T3	N0	M0	Tumor
TCGA-B0-5097-11A	female	59	Stage III	T3	N0	M0	Normal
TCGA-B0-5098-01A	female	53	Stage I	T1	NX	M0	Tumor
TCGA-B0-5098-11A	female	53	Stage I	T1	NX	M0	Normal
TCGA-B0-5099-01A	female	88	Stage III	T3	NX	M0	Tumor
TCGA-B0-5099-11A	female	88	Stage III	T3	NX	M0	Normal
TCGA-B0-5100-01A	male	72	Stage III	T3	NX	M0	Tumor
TCGA-B0-5100-11A	male	72	Stage III	T3	NX	M0	Normal
TCGA-B0-5102-01A	female	74	Stage I	T1	NX	M0	Tumor
TCGA-B0-5102-11A	female	74	Stage I	T1	NX	M0	Normal
TCGA-B0-5104-01A	female	90	Stage I	T1	N0	M0	Tumor
TCGA-B0-5104-11A	female	90	Stage I	T1	N0	M0	Normal
TCGA-B0-5106-01A	male	64	Stage I	T1	N0	M0	Tumor
TCGA-B0-5106-11A	male	64	Stage I	T1	N0	M0	Normal
TCGA-B0-5107-01A	female	65	Stage IV	T2	N0	M1	Tumor
TCGA-B0-5107-11A	female	65	Stage IV	T2	N0	M1	Normal
TCGA-B0-5108-01A	male	54	Stage III	T3	N0	M0	Tumor
TCGA-B0-5108-11A	male	54	Stage III	T3	N0	M0	Normal
TCGA-B0-5109-01A	male	69	Stage III	T3	N1	M0	Tumor
TCGA-B0-5109-11A	male	69	Stage III	T3	N1	M0	Normal
TCGA-B0-5110-01A	female	71	Stage I	T1	N0	M0	Tumor
TCGA-B0-5110-11A	female	71	Stage I	T1	N0	M0	Normal
TCGA-B0-5113-01A	female	69	Stage III	T3	N0	M0	Tumor
TCGA-B0-5113-11A	female	69	Stage III	T3	N0	M0	Normal
TCGA-B0-5115-01A	male	43	Stage IV	T2	N0	M1	Tumor
TCGA-B0-5115-11A	male	43	Stage IV	T2	N0	M1	Normal
TCGA-B0-5116-01A	male	52	Stage III	T3	N0	M0	Tumor
TCGA-B0-5116-11A	male	52	Stage III	T3	N0	M0	Normal
TCGA-B0-5117-01A	male	40	Stage I	T1	NX	M0	Tumor
TCGA-B0-5117-11A	male	40	Stage I	T1	NX	M0	Normal
TCGA-B0-5119-01A	female	61	Stage I	T1	N0	M0	Tumor
TCGA-B0-5119-11A	female	61	Stage I	T1	N0	M0	Normal
TCGA-B0-5120-01A	female	72	Stage I	T1	N0	M0	Tumor
TCGA-B0-5120-11A	female	72	Stage I	T1	N0	M0	Normal
TCGA-B0-5121-01A	male	56	Stage I	T1	N0	M0	Tumor
TCGA-B0-5121-11A	male	56	Stage I	T1	N0	M0	Normal
TCGA-B0-5399-01A	male	46	Stage I	T1	N0	M0	Tumor
TCGA-B0-5400-01A	female	59	Stage III	T3	N0	M0	Tumor
TCGA-B0-5400-11A	female	59	Stage III	T3	N0	M0	Normal
TCGA-B0-5402-01A	male	64	Stage IV	T4	NX	M0	Tumor
TCGA-B0-5402-11A	male	64	Stage IV	T4	NX	M0	Normal
TCGA-B0-5690-01A	female	53	Stage I	T1	NX	M0	Tumor
TCGA-B0-5691-01A	female	66	Stage I	T1	N0	M0	Tumor
TCGA-B0-5692-01A	female	66	Stage III	T3	N0	M0	Tumor
TCGA-B0-5693-01A	female	47	Stage I	T1	NX	M0	Tumor
TCGA-B0-5694-01A	male	71	Stage III	T3	N0	M0	Tumor
TCGA-B0-5695-01A	female	61	Stage I	T1	N0	M0	Tumor
TCGA-B0-5696-01A	male	69	Stage III	T3	N0	M0	Tumor
TCGA-B0-5697-01A	male	50	Stage I	T1	N0	M0	Tumor
TCGA-B0-5698-01A	male	77	Stage I	T1	N0	M0	Tumor
TCGA-B0-5699-01A	male	53	Stage I	T1	N0	M0	Tumor
TCGA-B0-5700-01A	male	77	Stage I	T1	N0	M0	Tumor
TCGA-B0-5701-01A	male	65	Stage III	T3	N0	M0	Tumor
TCGA-B0-5702-01A	male	71	Stage I	T1	N0	M0	Tumor
TCGA-B0-5703-01A	male	73	Stage I	T1	N0	M0	Tumor
TCGA-B0-5705-01A	female	65	Stage I	T1	N0	M0	Tumor
TCGA-B0-5706-01A	male	45	Stage II	T2	N0	M0	Tumor
TCGA-B0-5707-01A	female	39	Stage I	T1	N0	M0	Tumor
TCGA-B0-5709-01A	female	62	Stage III	T3	NX	M0	Tumor
TCGA-B0-5710-01A	male	57	Stage I	T1	N0	M0	Tumor
TCGA-B0-5710-11A	male	57	Stage I	T1	N0	M0	Normal
TCGA-B0-5711-01A	male	50	Stage III	T3	NX	M0	Tumor
TCGA-B0-5711-11A	male	50	Stage III	T3	NX	M0	Normal
TCGA-B0-5712-01A	female	68	Stage IV	T2	N0	M1	Tumor
TCGA-B0-5712-11A	female	68	Stage IV	T2	N0	M1	Normal
TCGA-B0-5713-01A	female	75	Stage III	T3	N0	M0	Tumor
TCGA-B0-5713-11A	female	75	Stage III	T3	N0	M0	Normal
TCGA-B0-5812-01A	male	53	Stage I	T1	NX	M0	Tumor
TCGA-B2-3924-01A	male	73	Stage I	T1	NX	M0	Tumor
TCGA-B2-3924-01B	male	73	Stage I	T1	NX	M0	Tumor
TCGA-B2-4101-01A	male	52	Stage II	T2	NX	M0	Tumor
TCGA-B2-5633-01A	male	56	Stage I	T1	N0	M0	Tumor
TCGA-B2-5633-01B	male	56	Stage I	T1	N0	M0	Tumor
TCGA-B2-5635-01A	male	74	Stage I	T1	NX	M0	Tumor
TCGA-B2-5635-01B	male	74	Stage I	T1	NX	M0	Tumor
TCGA-B2-5636-01A	male	79	Stage I	T1	NX	M0	Tumor
TCGA-B2-5639-01A	male	46	Stage IV	T3	NX	M1	Tumor
TCGA-B2-5641-01A	male	79	Stage I	T1	N0	M0	Tumor
TCGA-B2-A4SR-01A	male	61	Stage II	T2	NX	M0	Tumor
TCGA-B4-5377-01A	female	68	Stage IV	T3	N0	M1	Tumor
TCGA-B4-5378-01A	male	62	Stage I	T1	N0	M0	Tumor
TCGA-B4-5832-01A	male	65	Stage III	T3	N0	M0	Tumor
TCGA-B4-5834-01A	male	59	Stage I	T1	N0	M0	Tumor
TCGA-B4-5835-01A	female	64	Stage I	T1	N0	M0	Tumor
TCGA-B4-5836-01A	female	61	Stage I	T1	N0	M0	Tumor
TCGA-B4-5838-01A	male	52		T3	N1	M0	Tumor
TCGA-B4-5843-01A	male	45	Stage I	T1	N0	M0	Tumor
TCGA-B4-5844-01A	female	61	Stage II	T2	N0	M0	Tumor
TCGA-B8-4146-01B	female	41	Stage I	T1	NX	M0	Tumor
TCGA-B8-4153-01B	male	74	Stage III	T3	NX	M0	Tumor
TCGA-B8-4621-01A	male	63	Stage I	T1	N0	M0	Tumor
TCGA-B8-4622-01A	male	57	Stage IV	T3	N0	M1	Tumor
TCGA-B8-5158-01A	male	56	Stage III	T3	N1	M0	Tumor
TCGA-B8-5159-01A	female	61	Stage I	T1	N0	M0	Tumor
TCGA-B8-5162-01A	male	62	Stage II	T2	NX	M0	Tumor
TCGA-B8-5163-01A	female	63	Stage III	T3	N0	M0	Tumor
TCGA-B8-5164-01A	male	65	Stage III	T3	N0	M0	Tumor
TCGA-B8-5165-01A	male	43	Stage I	T1	N0	M0	Tumor
TCGA-B8-5545-01A	male	42	Stage I	T1	N0	M0	Tumor
TCGA-B8-5546-01A	female	38	Stage I	T1	N0	M0	Tumor
TCGA-B8-5549-01A	male	53	Stage I	T1	N0	M0	Tumor
TCGA-B8-5550-01A	male	71	Stage III	T3	N0	M0	Tumor
TCGA-B8-5551-01A	female	65	Stage I	T1	N0	M0	Tumor
TCGA-B8-5552-01B	female	41	Stage I	T1	NX	M0	Tumor
TCGA-B8-5553-01A	female	67	Stage I	T1	N0	M0	Tumor
TCGA-B8-A54D-01A	male	69	Stage III	T3	NX	MX	Tumor
TCGA-B8-A54E-01A	female	62	Stage I	T1	NX	MX	Tumor
TCGA-B8-A54F-01A	female	49	Stage I	T1	NX	MX	Tumor
TCGA-B8-A54G-01A	male	50	Stage I	T1	NX	MX	Tumor
TCGA-B8-A54H-01A	female	69	Stage II	T2	N0	MX	Tumor
TCGA-B8-A54I-01A	male	48	Stage I	T1	NX	MX	Tumor
TCGA-B8-A54J-01A	male	60	Stage II	T2	NX	MX	Tumor
TCGA-B8-A54K-01A	male	61	Stage I	T1	NX	MX	Tumor
TCGA-B8-A7U6-01A	female	54	Stage I	T1	NX		Tumor
TCGA-B8-A8YJ-01A	female	60	Stage I	T1	NX		Tumor
TCGA-BP-4177-01A	male	65	Stage I	T1	NX	M0	Tumor
TCGA-BP-4177-11A	male	65	Stage I	T1	NX	M0	Normal
TCGA-BP-4760-01A	male	69	Stage I	T1	NX	M0	Tumor
TCGA-BP-4760-11A	male	69	Stage I	T1	NX	M0	Normal
TCGA-BP-4770-01A	female	73	Stage IV	T4	N0	M0	Tumor
TCGA-BP-4770-11A	female	73	Stage IV	T4	N0	M0	Normal
TCGA-BP-4782-01A	female	55	Stage I	T1	NX	M0	Tumor
TCGA-BP-4782-11A	female	55	Stage I	T1	NX	M0	Normal
TCGA-BP-4795-01A	female	74	Stage I	T1	N0	M0	Tumor
TCGA-BP-4795-11A	female	74	Stage I	T1	N0	M0	Normal
TCGA-BP-4801-01A	male	57	Stage I	T1	NX	M0	Tumor
TCGA-BP-4801-11A	male	57	Stage I	T1	NX	M0	Normal
TCGA-BP-4993-01A	male	58	Stage I	T1	NX	M0	Tumor
TCGA-BP-4993-11A	male	58	Stage I	T1	NX	M0	Normal
TCGA-BP-5010-01A	male	63	Stage III	T3	N0	M0	Tumor
TCGA-BP-5010-11A	male	63	Stage III	T3	N0	M0	Normal
TCGA-BP-5168-01A	male	75	Stage I	T1	NX	M0	Tumor
TCGA-BP-5168-11A	male	75	Stage I	T1	NX	M0	Normal
TCGA-BP-5169-01A	male	70	Stage I	T1	N0	M0	Tumor
TCGA-BP-5169-11A	male	70	Stage I	T1	N0	M0	Normal
TCGA-BP-5170-01A	male	55	Stage I	T1	NX	M0	Tumor
TCGA-BP-5170-11A	male	55	Stage I	T1	NX	M0	Normal
TCGA-BP-5173-01A	male	75	Stage I	T1	NX	M0	Tumor
TCGA-BP-5173-11A	male	75	Stage I	T1	NX	M0	Normal
TCGA-BP-5174-01A	female	45	Stage I	T1	NX	M0	Tumor
TCGA-BP-5174-11A	female	45	Stage I	T1	NX	M0	Normal
TCGA-BP-5175-01A	male	60	Stage I	T1	NX	M0	Tumor
TCGA-BP-5175-11A	male	60	Stage I	T1	NX	M0	Normal
TCGA-BP-5176-01A	female	78	Stage I	T1	NX	M0	Tumor
TCGA-BP-5176-11A	female	78	Stage I	T1	NX	M0	Normal
TCGA-BP-5177-01A	female	46	Stage I	T1	NX	M0	Tumor
TCGA-BP-5177-11A	female	46	Stage I	T1	NX	M0	Normal
TCGA-BP-5178-01A	male	71	Stage IV	T3	NX	M1	Tumor
TCGA-BP-5178-11A	male	71	Stage IV	T3	NX	M1	Normal
TCGA-BP-5180-01A	male	53	Stage I	T1	NX	M0	Tumor
TCGA-BP-5180-11A	male	53	Stage I	T1	NX	M0	Normal
TCGA-BP-5181-01A	female	58	Stage I	T1	NX	M0	Tumor
TCGA-BP-5181-11A	female	58	Stage I	T1	NX	M0	Normal
TCGA-BP-5182-01A	male	56	Stage I	T1	N0	M0	Tumor
TCGA-BP-5182-11A	male	56	Stage I	T1	N0	M0	Normal
TCGA-BP-5183-01A	male	57	Stage III	T3	NX	M0	Tumor
TCGA-BP-5183-11A	male	57	Stage III	T3	NX	M0	Normal
TCGA-BP-5184-01A	male	54	Stage I	T1	NX	M0	Tumor
TCGA-BP-5184-11A	male	54	Stage I	T1	NX	M0	Normal
TCGA-BP-5185-01A	male	56	Stage I	T1	NX	M0	Tumor
TCGA-BP-5185-11A	male	56	Stage I	T1	NX	M0	Normal
TCGA-BP-5186-01A	female	50	Stage I	T1	N0	M0	Tumor
TCGA-BP-5186-11A	female	50	Stage I	T1	N0	M0	Normal
TCGA-BP-5187-01A	male	54	Stage I	T1	NX	M0	Tumor
TCGA-BP-5187-11A	male	54	Stage I	T1	NX	M0	Normal
TCGA-BP-5189-01A	male	60	Stage I	T1	NX	M0	Tumor
TCGA-BP-5189-11A	male	60	Stage I	T1	NX	M0	Normal
TCGA-BP-5190-01A	male	61	Stage I	T1	NX	M0	Tumor
TCGA-BP-5190-11A	male	61	Stage I	T1	NX	M0	Normal
TCGA-BP-5191-01A	male	79	Stage III	T3	N0	M0	Tumor
TCGA-BP-5191-11A	male	79	Stage III	T3	N0	M0	Normal
TCGA-BP-5192-01A	male	59	Stage I	T1	NX	M0	Tumor
TCGA-BP-5192-11A	male	59	Stage I	T1	NX	M0	Normal
TCGA-BP-5194-01A	male	39	Stage I	T1	NX	M0	Tumor
TCGA-BP-5194-11A	male	39	Stage I	T1	NX	M0	Normal
TCGA-BP-5195-01A	male	75	Stage I	T1	NX	M0	Tumor
TCGA-BP-5195-11A	male	75	Stage I	T1	NX	M0	Normal
TCGA-BP-5196-01A	male	53	Stage I	T1	NX	M0	Tumor
TCGA-BP-5196-11A	male	53	Stage I	T1	NX	M0	Normal
TCGA-BP-5198-01A	male	72	Stage III	T3	N0	M0	Tumor
TCGA-BP-5198-11A	male	72	Stage III	T3	N0	M0	Normal
TCGA-BP-5199-01A	male	58	Stage II	T2	N0	M0	Tumor
TCGA-BP-5199-11A	male	58	Stage II	T2	N0	M0	Normal
TCGA-BP-5200-01A	male	44	Stage II	T2	NX	M0	Tumor
TCGA-BP-5200-11A	male	44	Stage II	T2	NX	M0	Normal
TCGA-BP-5201-01A	male	63	Stage IV	T3	N0	M1	Tumor
TCGA-BP-5201-11A	male	63	Stage IV	T3	N0	M1	Normal
TCGA-BP-5202-01A	male	75	Stage III	T3	NX	M0	Tumor
TCGA-BP-5202-11A	male	75	Stage III	T3	NX	M0	Normal
TCGA-CJ-4869-01A	male	49	Stage III	T2	N1	M0	Tumor
TCGA-CJ-4869-11A	male	49	Stage III	T2	N1	M0	Normal
TCGA-CJ-4882-01A	male	57	Stage III	T3	NX	M0	Tumor
TCGA-CJ-4882-11A	male	57	Stage III	T3	NX	M0	Normal
TCGA-CJ-4897-01A	female	79	Stage III	T3	NX	M0	Tumor
TCGA-CJ-4897-11A	female	79	Stage III	T3	NX	M0	Normal
TCGA-CJ-4901-01A	male	47	Stage III	T3	NX	M0	Tumor
TCGA-CJ-4901-11A	male	47	Stage III	T3	NX	M0	Normal
TCGA-CJ-4902-01A	male	61	Stage III	T3	NX	M0	Tumor
TCGA-CJ-4902-11A	male	61	Stage III	T3	NX	M0	Normal
TCGA-CJ-4903-01A	male	50	Stage I	T1	NX	M0	Tumor
TCGA-CJ-4903-11A	male	50	Stage I	T1	NX	M0	Normal
TCGA-CJ-4904-01A	female	60	Stage IV	T3	N0	M1	Tumor
TCGA-CJ-4904-11A	female	60	Stage IV	T3	N0	M1	Normal
TCGA-CJ-4905-01A	female	62	Stage I	T1	NX	M0	Tumor
TCGA-CJ-4905-11A	female	62	Stage I	T1	NX	M0	Normal
TCGA-CJ-4907-01A	male	58	Stage III	T3	NX	M0	Tumor
TCGA-CJ-4907-11A	male	58	Stage III	T3	NX	M0	Normal
TCGA-CJ-4908-01A	male	38	Stage I	T1	NX	M0	Tumor
TCGA-CJ-4908-11A	male	38	Stage I	T1	NX	M0	Normal
TCGA-CJ-4912-01A	male	61	Stage II	T2	NX	M0	Tumor
TCGA-CJ-4912-11A	male	61	Stage II	T2	NX	M0	Normal
TCGA-CJ-4913-01A	female	45	Stage III	T3	NX	M0	Tumor
TCGA-CJ-4913-11A	female	45	Stage III	T3	NX	M0	Normal
TCGA-CJ-4916-01A	female	69	Stage III	T3	NX	M0	Tumor
TCGA-CJ-4916-11A	female	69	Stage III	T3	NX	M0	Normal
TCGA-CJ-4918-01A	male	64	Stage IV	T3	N0	M1	Tumor
TCGA-CJ-4918-11A	male	64	Stage IV	T3	N0	M1	Normal
TCGA-CJ-4920-01A	female	64	Stage I	T1	NX	M0	Tumor
TCGA-CJ-4920-11A	female	64	Stage I	T1	NX	M0	Normal
TCGA-CJ-4923-01A	female	63	Stage IV	T3	NX	M1	Tumor
TCGA-CJ-4923-11A	female	63	Stage IV	T3	NX	M1	Normal
TCGA-CJ-5671-01A	male	51	Stage I	T1	NX	M0	Tumor
TCGA-CJ-5672-01A	male	84	Stage I	T1	NX	M0	Tumor
TCGA-CJ-5675-01A	male	70	Stage II	T2	NX	M0	Tumor
TCGA-CJ-5676-01A	male	47	Stage III	T3	NX	M0	Tumor
TCGA-CJ-5677-01A	female	54	Stage IV	T3	NX	M1	Tumor
TCGA-CJ-5678-01A	male	62	Stage IV	T2	N0	M1	Tumor
TCGA-CJ-5679-01A	male	73	Stage III	T3	NX	M0	Tumor
TCGA-CJ-5680-01A	female	65	Stage IV	T3	NX	M1	Tumor
TCGA-CJ-5681-01A	female	44	Stage IV	T3	NX	M1	Tumor
TCGA-CJ-5682-01A	male	60	Stage IV	T3	NX	M1	Tumor
TCGA-CJ-5683-01A	male	78	Stage I	T1	NX	M0	Tumor
TCGA-CJ-5684-01A	male	61	Stage III	T3	NX	M0	Tumor
TCGA-CJ-5686-01A	female	59	Stage I	T1	NX	M0	Tumor
TCGA-CJ-5689-01A	male	90	Stage I	T1	NX	M0	Tumor
TCGA-CJ-6027-01A	male	77	Stage I	T1	NX	M0	Tumor
TCGA-CJ-6028-01A	male	58	Stage IV	T3	NX	M1	Tumor
TCGA-CJ-6030-01A	male	65	Stage I	T1	N0	M0	Tumor
TCGA-CJ-6031-01A	male	54	Stage I	T1	NX	M0	Tumor
TCGA-CJ-6032-01A	female	63	Stage II	T2	NX	M0	Tumor
TCGA-CJ-6033-01A	female	54	Stage IV	T3	N0	M1	Tumor
TCGA-CW-5580-01A	female	73	Stage IV	T3	NX	M1	Tumor
TCGA-CW-5581-01A	male	44	Stage I	T1	NX	M0	Tumor
TCGA-CW-5583-01A	female	51	Stage I	T1	NX	M0	Tumor
TCGA-CW-5584-01A	male	74	Stage III	T3	N1	M0	Tumor
TCGA-CW-5585-01A	male	51	Stage IV	T3	N0	M1	Tumor
TCGA-CW-5587-01A	female	62	Stage III	T3	N0	M0	Tumor
TCGA-CW-5588-01A	female	78	Stage I	T1	NX	M0	Tumor
TCGA-CW-5589-01A	male	52	Stage I	T1	NX	M0	Tumor
TCGA-CW-5590-01A	male	51	Stage IV	T3	NX	M1	Tumor
TCGA-CW-5591-01A	male	56	Stage IV	T3	N0	M1	Tumor
TCGA-CW-6087-01A	male	61	Stage IV	T3	N1	M1	Tumor
TCGA-CW-6088-01A	male	60	Stage I	T1	N0	M0	Tumor
TCGA-CW-6090-01A	male	68	Stage I	T1	NX	M0	Tumor
TCGA-CW-6093-01A	male	73	Stage I	T1	NX	M0	Tumor
TCGA-CW-6097-01A	male	32	Stage III	T3	NX	M0	Tumor
TCGA-CZ-4853-01A	male	82	Stage I	T1	NX	M0	Tumor
TCGA-CZ-4853-11A	male	82	Stage I	T1	NX	M0	Normal
TCGA-CZ-4856-01A	female	62	Stage I	T1	N0	M0	Tumor
TCGA-CZ-4856-11A	female	62	Stage I	T1	N0	M0	Normal
TCGA-CZ-4859-01A	female	59	Stage I	T1	N0	M0	Tumor
TCGA-CZ-4859-11A	female	59	Stage I	T1	N0	M0	Normal
TCGA-CZ-4863-01A	female	51	Stage III	T3	N0	M0	Tumor
TCGA-CZ-4863-11A	female	51	Stage III	T3	N0	M0	Normal
TCGA-CZ-4864-01A	male	86	Stage II	T2	N0	M0	Tumor
TCGA-CZ-4864-11A	male	86	Stage II	T2	N0	M0	Normal
TCGA-CZ-4865-01A	female	70	Stage I	T1	NX	M0	Tumor
TCGA-CZ-4865-11A	female	70	Stage I	T1	NX	M0	Normal
TCGA-CZ-4866-01A	female	79	Stage I	T1	NX	M0	Tumor
TCGA-CZ-4866-11A	female	79	Stage I	T1	NX	M0	Normal
TCGA-CZ-5451-01A	male	74	Stage II	T2	N0	M0	Tumor
TCGA-CZ-5451-11A	male	74	Stage II	T2	N0	M0	Normal
TCGA-CZ-5452-01A	male	69	Stage II	T2	N0	M0	Tumor
TCGA-CZ-5452-11A	male	69	Stage II	T2	N0	M0	Normal
TCGA-CZ-5453-01A	male	67	Stage II	T2	NX	M0	Tumor
TCGA-CZ-5453-11A	male	67	Stage II	T2	NX	M0	Normal
TCGA-CZ-5454-01A	male	63	Stage IV	T2	N0	M1	Tumor
TCGA-CZ-5454-11A	male	63	Stage IV	T2	N0	M1	Normal
TCGA-CZ-5455-01A	male	63	Stage IV	T3	NX	M1	Tumor
TCGA-CZ-5455-11A	male	63	Stage IV	T3	NX	M1	Normal
TCGA-CZ-5456-01A	male	57	Stage II	T2	N0	M0	Tumor
TCGA-CZ-5456-11A	male	57	Stage II	T2	N0	M0	Normal
TCGA-CZ-5457-01A	male	62	Stage III	T3	NX	M0	Tumor
TCGA-CZ-5457-11A	male	62	Stage III	T3	NX	M0	Normal
TCGA-CZ-5458-01A	male	43	Stage III	T3	NX	M0	Tumor
TCGA-CZ-5458-11A	male	43	Stage III	T3	NX	M0	Normal
TCGA-CZ-5459-01A	male	63	Stage III	T3	NX	M0	Tumor
TCGA-CZ-5459-11A	male	63	Stage III	T3	NX	M0	Normal
TCGA-CZ-5460-01A	male	55	Stage IV	T3	NX	M1	Tumor
TCGA-CZ-5460-11A	male	55	Stage IV	T3	NX	M1	Normal
TCGA-CZ-5461-01A	male	52	Stage IV	T1	NX	M1	Tumor
TCGA-CZ-5461-11A	male	52	Stage IV	T1	NX	M1	Normal
TCGA-CZ-5462-01A	male	83	Stage IV	T1	NX	M1	Tumor
TCGA-CZ-5462-11A	male	83	Stage IV	T1	NX	M1	Normal
TCGA-CZ-5463-01A	male	76	Stage II	T2	NX	M0	Tumor
TCGA-CZ-5463-11A	male	76	Stage II	T2	NX	M0	Normal
TCGA-CZ-5464-01A	male	69	Stage IV	T3	NX	M1	Tumor
TCGA-CZ-5464-11A	male	69	Stage IV	T3	NX	M1	Normal
TCGA-CZ-5465-01A	female	76	Stage III	T3	NX	M0	Tumor
TCGA-CZ-5465-11A	female	76	Stage III	T3	NX	M0	Normal
TCGA-CZ-5466-01A	male	67	Stage III	T3	NX	M0	Tumor
TCGA-CZ-5466-11A	male	67	Stage III	T3	NX	M0	Normal
TCGA-CZ-5467-01A	female	86	Stage III	T3	N0	M0	Tumor
TCGA-CZ-5467-11A	female	86	Stage III	T3	N0	M0	Normal
TCGA-CZ-5468-01A	male	84	Stage IV	T3	NX	M1	Tumor
TCGA-CZ-5468-11A	male	84	Stage IV	T3	NX	M1	Normal
TCGA-CZ-5469-01A	male	41	Stage II	T2	N0	M0	Tumor
TCGA-CZ-5469-11A	male	41	Stage II	T2	N0	M0	Normal
TCGA-CZ-5470-01A	female	72	Stage II	T2	N0	M0	Tumor
TCGA-CZ-5470-11A	female	72	Stage II	T2	N0	M0	Normal
TCGA-CZ-5982-01A	female	59	Stage I	T1	NX	M0	Tumor
TCGA-CZ-5984-01A	male	51	Stage I	T1	N0	M0	Tumor
TCGA-CZ-5985-01A	male	58	Stage II	T2	N0	M0	Tumor
TCGA-CZ-5986-01A	male	61	Stage I	T1	N0	M0	Tumor
TCGA-CZ-5987-01A	male	60	Stage IV	T3	NX	M1	Tumor
TCGA-CZ-5988-01A	male	38	Stage I	T1	N0	M0	Tumor
TCGA-CZ-5989-01A	male	60	Stage II	T2	N0	M0	Tumor
TCGA-DV-5565-01A	male	59	Stage I	T1	NX	M0	Tumor
TCGA-DV-5566-01A	female	67	Stage I	T1	NX	M0	Tumor
TCGA-DV-5567-01A	female	40	Stage I	T1	NX	M0	Tumor
TCGA-DV-5568-01A	male	26	Stage I	T1	NX	M0	Tumor
TCGA-DV-5569-01A	female	29	Stage I	T1	NX	M0	Tumor
TCGA-DV-5573-01A	male	41	Stage I	T1	NX	M0	Tumor
TCGA-DV-5574-01A	male	37	Stage I	T1	NX	M0	Tumor
TCGA-DV-5575-01A	female	52	Stage I	T1	NX	M0	Tumor
TCGA-DV-5576-01A	female	55	Stage I	T1	NX	M0	Tumor
TCGA-DV-A4VX-01A	male	59	Stage IV	T3	N0	MX	Tumor
TCGA-DV-A4VZ-01A	male	53	Stage I	T1	NX	MX	Tumor
TCGA-DV-A4W0-01A	male	55	Stage I	T1	NX	MX	Tumor
TCGA-DV-A4W0-05A	male	55	Stage I	T1	NX	MX	Tumor
TCGA-EU-5904-01A	female	47	Stage I	T1	NX	M0	Tumor
TCGA-EU-5905-01A	female	67	Stage I	T1	NX	M0	Tumor
TCGA-EU-5906-01A	male	55	Stage I	T1	NX	M0	Tumor
TCGA-EU-5907-01A	male	81	Stage III	T3	NX	M0	Tumor
TCGA-G6-A5PC-01A	female	54	Stage IV	T1	N0	M1	Tumor
TCGA-G6-A8L6-01A	male	55	Stage IV	T2	NX	MX	Tumor
TCGA-G6-A8L7-01A	female	81	Stage I	T1	N0	MX	Tumor
TCGA-G6-A8L8-01A	female	62	Stage I	T1	NX	MX	Tumor
TCGA-GK-A6C7-01A	female	76	Stage I	T1	NX	MX	Tumor
TCGA-MM-A563-01A	male	41		T3	NX	MX	Tumor
TCGA-MM-A564-01A	male	68	Stage II	T2	NX	MX	Tumor
TCGA-MM-A84U-01A	female	58	Stage I	T1	NX	MX	Tumor
TCGA-MW-A4EC-01A	female	72	Stage I	T1	NX	MX	Tumor
TCGA-T7-A92I-01A	female	47	Stage I	T1	NX	MX	Tumor
